# Supplementary material
Source: publisher site journal article supplement (https://www.spandidos-publications.com/571/downloadSupplementary)
Supplement: Supplementary file 1 [file downloadSupplementary]

Table SI. Supplementary information of BD patients.

|                                                       | No. | Percent (%) |
|-------------------------------------------------------|-----|-------------|
| <b>BD patients</b>                                    | 45  | -           |
| <b>Vasculitis-associated symptoms</b>                 |     |             |
| Chest tightness and shortness of breath               | 22  | 48.9        |
| Abdominal pain                                        | 14  | 31.1        |
| Backache                                              | 4   | 8.9         |
| Left lower extremity pain                             | 8   | 17.8        |
| Hoarseness                                            | 3   | 6.7         |
| <b>Patients with aneurysms</b>                        | 38  | 84.4        |
| <b>Patients with multiple aneurysms</b>               | 14  | 31.1        |
| <b>No. of aneurysms</b>                               | 42  | -           |
| Aorta aneurysms                                       | 28  | 66.7        |
| Thoracic aorta aneurysms                              | 20  | 47.6        |
| Abdominal aorta aneurysms                             | 8   | 19.1        |
| Large artery aneurysms                                | 14  | 33.3        |
| <b>Unilateral thrombosis of lower extremity veins</b> | 7   | 16.7        |
| <b>Location of arterial thromboembolism</b>           | 18  | -           |
| Bilateral pulmonary arteries                          | 8   | 44.4        |
| Bilateral renal arteries                              | 2   | 11.1        |
| Superior mesenteric artery                            | 2   | 11.1        |
| Right subclavian artery                               | 1   | 5.6         |
| Subclavian artery                                     | 3   | 16.7        |
| Coronary artery                                       | 2   | 11.1        |
| <b>Laboratory examinations</b>                        |     |             |
| Elevated ESR                                          | 44  | 97.8        |
| Elevated CRP                                          | 22  | 48.9        |
| Elevated blood cell counts                            | 22  | 48.9        |
| Elevated D-dimer levels                               | 22  | 48.9        |
| Elevated neutrophil counts                            | 16  | 35.6        |
| Decreased hemoglobin                                  | 14  | 31.1        |
| Decreased platelet counts                             | 6   | 13.3        |
| <b>Aortic aneurysms</b>                               | 28  | 66.7        |
| Thoracic aorta                                        | 20  | 71.4        |
| Abdominal aorta                                       | 8   | 28.6        |
| <b>Large artery aneurysms</b>                         |     |             |
| Right brachiocephalic trunk                           | 2   | 14.3        |
| Right internal thoracic artery                        | 1   | 7.1         |
| Right carotid artery                                  | 2   | 14.3        |
| Left femoral artery                                   | 2   | 14.3        |
| Iliac arteries                                        | 5   | 35.7        |
| Right pulmonary artery                                | 2   | 14.3        |
| <b>Medical treatment</b>                              | 42  | 93.3        |
| <b>Surgical Treatment</b>                             | 21  | -           |
| Endovascular graft exclusion                          | 4   | 19.1        |
| Bentall surgery                                       | 4   | 19.1        |
| Aortic valve replacement                              | 5   | 23.8        |
| Inferior vena cava filter placement                   | 3   | 14.3        |
| Aneurysmectomy                                        | 5   | 23.8        |
| <b>Refused treatment</b>                              | 2   | 4.4         |
| <b>Follow-up</b>                                      |     |             |
| Aneurysm shrinkage                                    | 9   | 20          |
| Aneurysm rupture                                      | 2   | 4.4         |
| Mass hemoptysis                                       | 1   | 2.2         |
| Recurrence after surgery                              | 4   | 8.9         |
| Aneurysm progression                                  | 4   | 8.9         |
| Coronary in-stent restenosis                          | 2   | 4.4         |
| Died of aneurysmal rupture                            | 2   | 4.4         |
